# Supplementary material for: Salidroside promotes peripheral nerve regeneration based on tissue engineering strategy using Schwann cells and PLGA: in vitro and in vivo
Source: PubMed Central journal article supplement (PMC5213129; doi:10.1038/srep39869), 2017-01-05
Supplement: srep39869-s1.pdf [file srep39869-s1.pdf]

**Salidroside promotes peripheral nerve regeneration based on tissue engineering strategy using Schwann cells and PLGA: *in vitro* and *in vivo***

**Hui Liu<sup>1,2+</sup>, Peizhen Lv<sup>1,3+</sup>, Yongjia Zhu<sup>4+</sup>, Huayu Wu<sup>5</sup>, Kun Zhang<sup>1,4</sup>, Fuben Xu<sup>1,6</sup>, Li Zheng<sup>1,2,6\*</sup>, Jinmin Zhao<sup>1,2,4,7\*</sup>**

<sup>1</sup>Guangxi Engineering Center in Biomedical Material for Tissue and Organ Regeneration, Guangxi Medical University, Nanning, China

<sup>2</sup> The Collaborative Innovation Center of Guangxi Biological Medicine, Guangxi Medical University, Nanning, China

<sup>3</sup>Department of Spine Surgery, The Third Affiliated Hospital of Guangxi Medical University, Nanning, China.

<sup>4</sup> Department of Orthopaedics Trauma and Hand Surgery, The First Affiliated Hospital of Guangxi Medical University, Nanning, China.

<sup>5</sup> Department of Cell Biology & Genetics, School of Premedical Sciences, Guangxi Medical University, Nanning, China

<sup>6</sup>The Medical and Scientific Research Center, Guangxi Medical University, Nanning, China

<sup>7</sup> Guangxi Key Laboratory of Regenerative Medicine, Guangxi Medical University, Nanning, China

Hui Liu, Peizhen Lv and Yongjia Zhu contributed equally to this work.

\* Co-Corresponding authors.

Li Zheng: Tel: +86-07715358132. Fax: +86-07715350975. Email address: zhengli224@163.com

Jinmin Zhao: Tel: +86-07715350189. Fax: +86-07715350189. Email address:

[zhaojinmin@126.com](mailto:zhaojinmin@126.com)

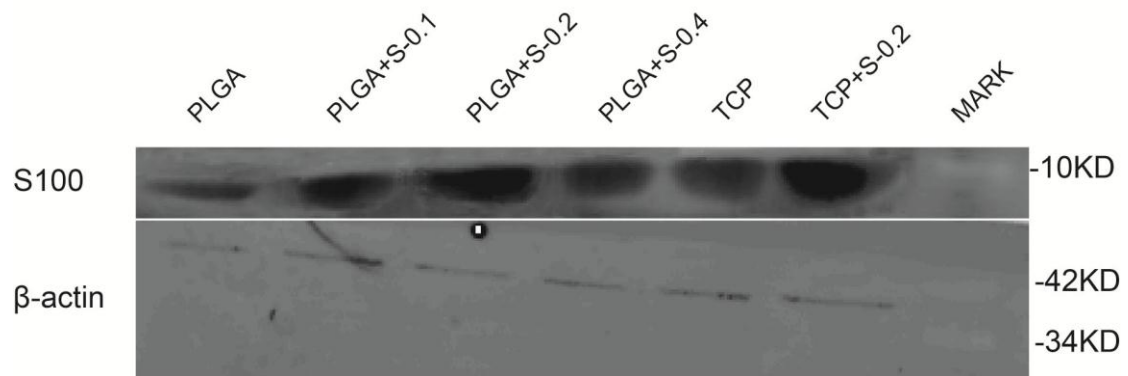

Legend: Full-length blots of S-100 protein in Figure 3C. (PLGA means cultured with 0 mM SDS, PLGA+S-0.1 means cultured with 0.1 mM SDS, PLGA+S-0.2 means cultured with 0.2mM SDS, PLGA+S-0.4 means cultured with 0.4mM SDS, TCP means cultured on TCP alone, TCP+s-0.2 means cultured with 0.2mM SDS on TCP).
